# Supplementary material
Source: publisher figshare collection journal article supplement (https://acs.figshare.com/ndownloader/files/3724042)
Supplement: Supplementary file 1 [file 3724042]

# Supporting information

## **siRNA-Loaded Polyion Complex Micelle Decorated with Charge- Conversional Polymer Tuned to Undergo Stepwise Response to Intra- Tumoral and Intra-Endosomal pHs for Exerting Enhanced RNAi Efficacy**

Montira Tangsangasakri<sup>1</sup>, Hiroyasu Takemoto<sup>2</sup>, Mitsuru Naito<sup>3</sup>, Yoshinori Maeda<sup>3</sup>, Daiki Sueyoshi<sup>1</sup>, Hyun Jin Kim<sup>3</sup>, Yutaka Miura<sup>3</sup>, Jooyeon Ahn<sup>4</sup>, Ryota Azuma<sup>4</sup>, Nobuhiro Nishiyama<sup>2,5</sup>, Kanjiro Miyata<sup>3,5\*</sup>, and Kazunori Kataoka<sup>1,3,4,5,\*</sup>

<sup>1</sup>Department of Bioengineering, Graduate School of Engineering, The University of Tokyo, 7-3-1 Hongo, Bunkyo-ku, Tokyo 113-8656, Japan

<sup>2</sup>Polymer Chemistry Division, Chemical Resources Laboratory, Tokyo Institute of Technology, R1-11, 4259 Nagatsuta, Midori-ku, Yokohama 226-8503, Japan

<sup>3</sup>Center for Disease Biology and Integrative Medicine, Graduate School of Medicine, The University of Tokyo, 7-3-1 Hongo, Bunkyo-ku, Tokyo 113-0033, Japan

<sup>4</sup>Department of Materials Engineering, Graduate School of Engineering, The University of Tokyo, 7-3-1 Hongo, Bunkyo-ku, Tokyo 113-8656, Japan

<sup>5</sup>Innovation Center of NanoMedicine, Institute of Industry Promotion-Kawasaki, 3-25-14 Tonomachi, Kawasaki-ku, Kawasaki 210-0821, Japan.

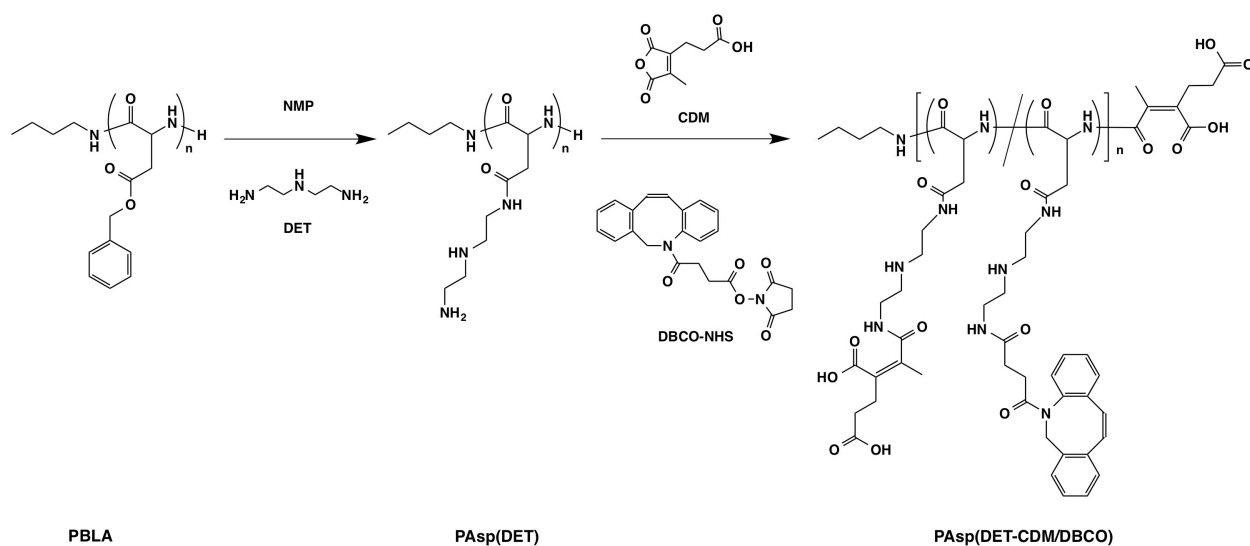

**Scheme S1.** Synthesis procedure of PAsp(DET-CDM/DBCO). This polyaspartamide derivative has the mixed sequence of  $\alpha$  and  $\beta$  isomers and its  $\omega$ -end may be modified with either CDM or DBCO moieties. The  $\alpha$  isomers of PAsp(DET) and PAsp(DET-CDM/DBCO) and the CDM-modified  $\omega$ -end are depicted as a representative structure for simplicity.

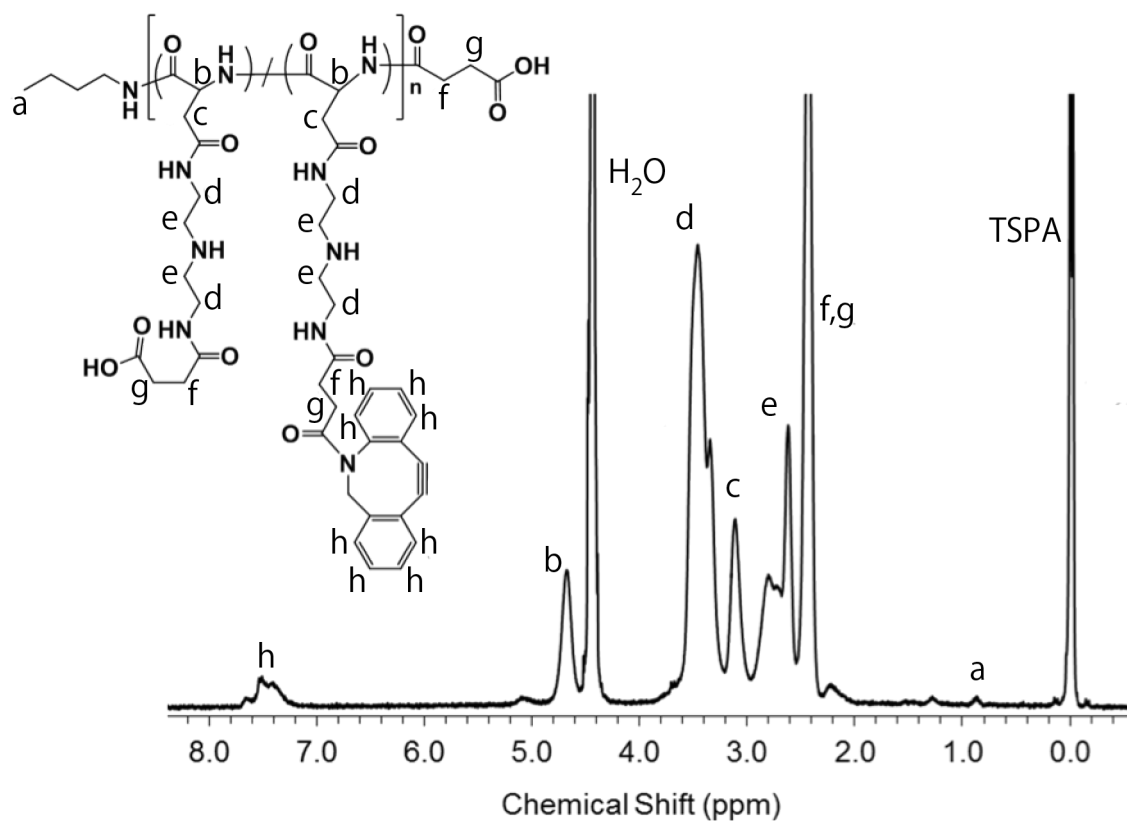

**Figure S1.**  $^1\text{H}$  NMR spectrum of PAsp(DET-SUC/DBCO) in  $\text{D}_2\text{O}$  at  $70^\circ\text{C}$  (polymer concentration = 5 mg/mL). This polyaspartamide derivative has the mixed sequence of  $\alpha$  and  $\beta$  isomers and its  $\omega$ -end may be modified with either SUC or DBCO moieties. Only  $\alpha$  isomer of PAsp(DET-SUC/DBCO) and SUC-modified  $\omega$ -end are depicted as a representative structure for simplicity.

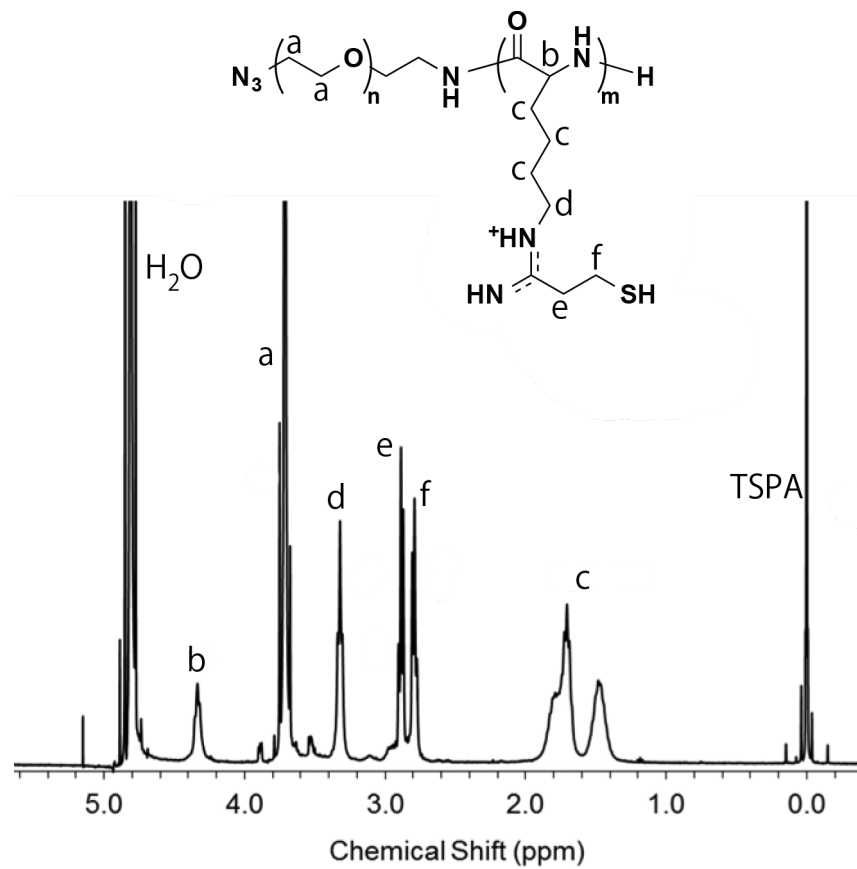

**Figure S2.**  $^1\text{H}$  NMR spectrum of  $\text{N}_3\text{-PEG-}b\text{-PLys(MPA)}$  in  $\text{D}_2\text{O}$  at  $25\text{ }^\circ\text{C}$  (polymer concentration =  $5\text{ mg/mL}$ ).

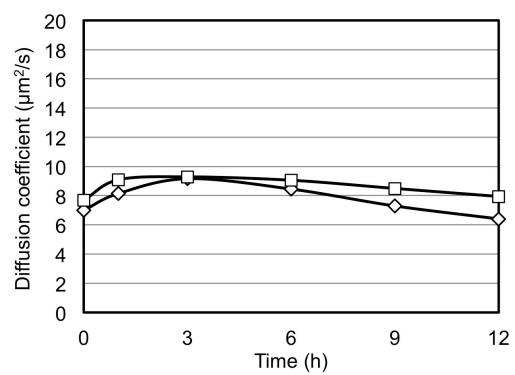

**Figure S3.** Stability of nonmodified micelles (open diamond) and CDM-micelles (open square) (100 nM Cy3/Chol-siRNA) in 90% FBS-containing HEPES buffer (pH 7.4), determined by FCS.

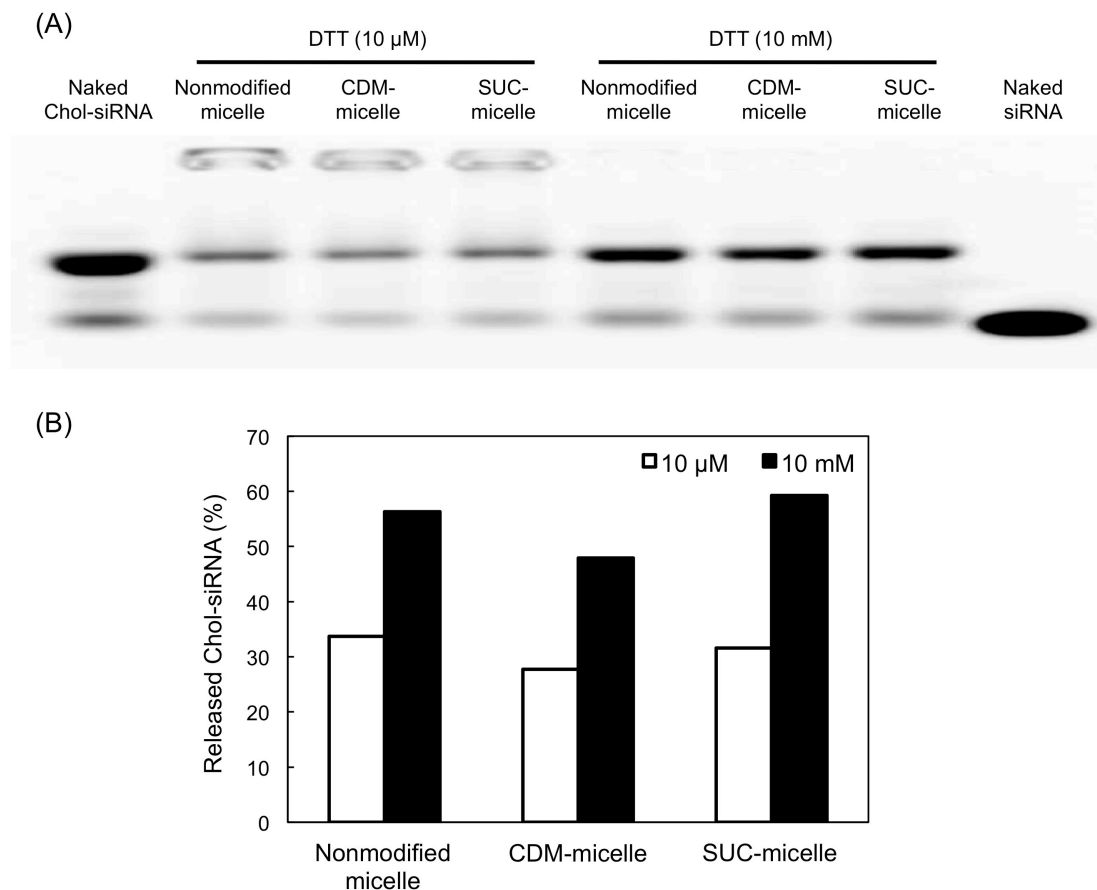

**Figure S4.** siRNA release profiles of nonmodified micelle, CDM-micelle, and SUC-micelle under two varying reductive conditions. Each micelle sample was prepared with Cy3/Chol-siRNA and mixed with dextran sulfate at a residual molar ratio of sulfate group in dextran sulfate to phosphate group in siRNA = 0.5 in the presence of 10  $\mu$ M or 10 mM concentration of dithiothreitol (DTT). After 1 h incubation at 37  $^{\circ}$ C, samples were electrophoresed in 1% agarose gel (100 V, 20 min). The agarose gel was imaged (A) and quantitatively analyzed based on densitometry of detected Cy3 signals (B) using Molecular Imager<sup>®</sup> PharosFX<sup>™</sup> Systems (Bio-Rad Laboratories).

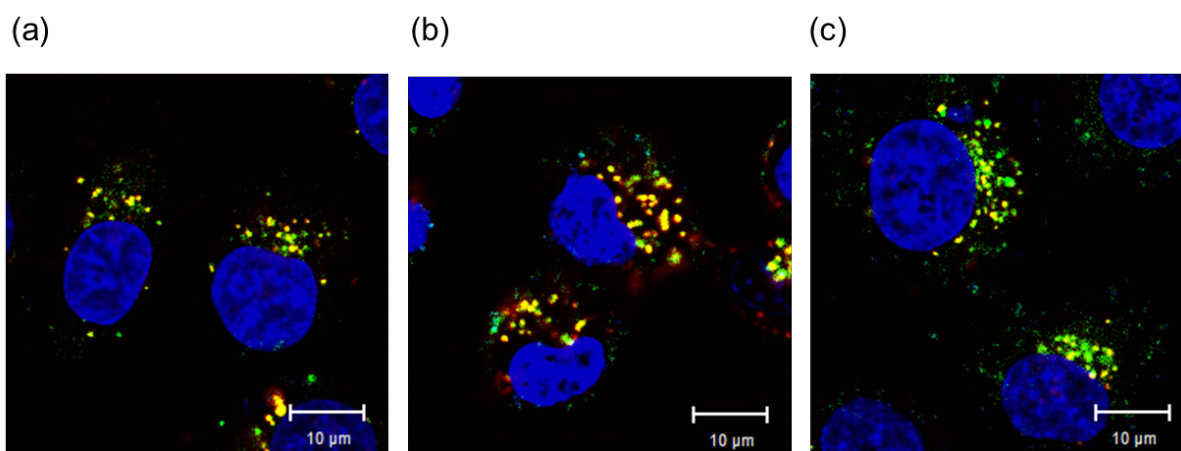

**Figure S5.** CLSM images of A549 cells after 12 h incubation with (a) nonmodified micelles, (b) CDM-micelles, and (c) SUC-micelles at pH 6.7 (siRNA concentration = 200 nM). Red: Cy3/Chol-siRNA, green: late endosome/lysosome stained with LysoTracker Green, blue: nuclei stained with Hoechst 33342, and yellow: colocalization between red and green pixels.

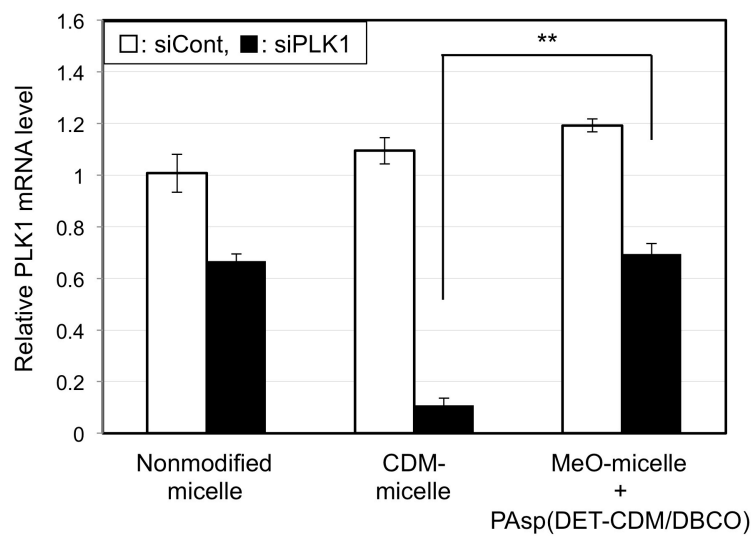

**Figure S6.** Gene silencing efficiencies of nonmodified micelles prepared from N<sub>3</sub>-PEG-*b*-PLys(MPA) without PAsp(DET-CDM/DBCO), CDM-micelles prepared from N<sub>3</sub>-PEG-*b*-PLys(MPA) with PAsp(DET-CDM/DBCO), and MeO-micelles prepared from MeO-PEG-*b*-PLys(MPA) with PAsp(DET-CDM/DBCO) in A549 cells cultured at pH 6.7 (siRNA concentration = 200 nM). Data represent the means  $\pm$  SEM (n = 4). \*\*:  $p < 0.01$ .



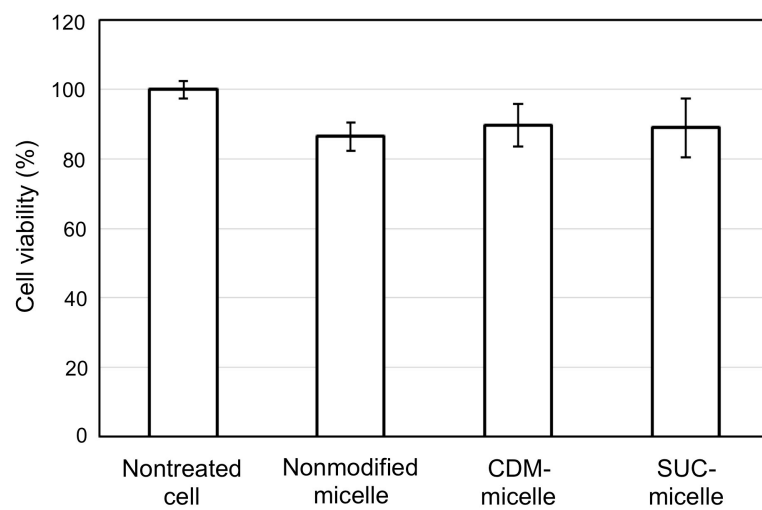

**Figure S7.** Viability of A549 cells after 48 h incubation with nonmodified micelles, CDM-micelles, and SUC-micelles at pH 7.4 (siRNA concentration = 200 nM). Data represent the means  $\pm$  SEM (n = 4).
